# Supplementary material
Source: Springer Nature journal article supplement (https://www.springermedizin.de/resource/supplementary/12885_2013_3971_MOESM3_ESM.pdf/9464934)

*Trp53*-wt

*Trp53*-null

p21

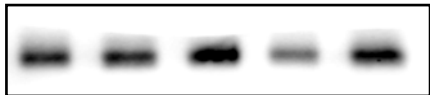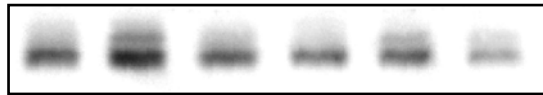

p63

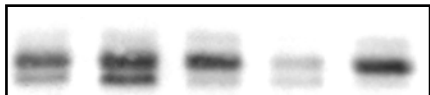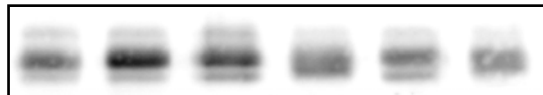

Bax

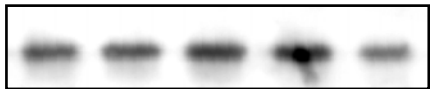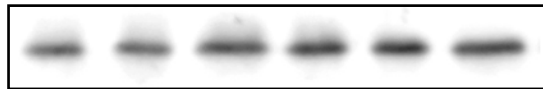

Actin

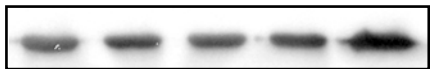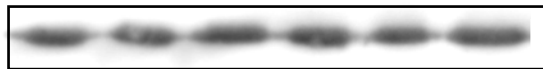

4h 24h 48h 72h 96h

Ctrl 4h 24h 48h 72h 96h

Supplement: MOESM3 [file 9464934]
